# Supplementary material for: The Customer Isn't Always Right—Conservation and Animal Welfare Implications of the Increasing Demand for Wildlife Tourism
Source: PLoS One. 2015 Oct 21;10(10):e0138939. doi: 10.1371/journal.pone.0138939 (PMC4619427; doi:10.1371/journal.pone.0138939)
Supplement: S1 Data — Table showing the name, WTA (wildlife tourist attraction) type, WTA category, geographical location, URL and the feedback ratings left on TripAdvisor, for the 188 wildlife tourist attractions assessed for the creation of tourist dissatisfaction scores. Figures in columns “Terrible” to “Excellent” refer to the number of tourists who elected this response to the WTA on TripAdvisor on the date the WTA was assessed. The following two columns detail how many ‘Terrible’ and ‘Poor’ reviews for a given WTA were discounted due to being awarded for reasons other than welfare or conservation standards. Columns “Positive” and “Negative” contain the overall number of positive reviews, and of negative reviews awarded on the basis of conservation and welfare standards. The column “Percentage” contains the tourist dissatisfaction score. (XLSX) [file pone.0138939.s003.xlsx]

## Sheet: Sheet1
Search term	Type	Category	Country	Attraction	Date rated	URL	Terrible	Poor	Average	Very Good	Excellent	Total reviews	Terrible_reviews_not_due_to_conservation_or_welfare	Poor_reviews_not_due_to_conservation_or_welfare	Negative	Positive	Percentage
Bear	Bear park	Captive	Japan	Bear Mountain Sahoro	2014-10-09	http://www.tripadvisor.co.uk/Attraction_Review-g1025638-d671232-Reviews-Bear_Mou	0	1	3	16	19	39	0	1	0	35	0
Bear	Bear park	Captive	Japan	Noboribetsu Bear Park	2014-10-09	http://www.tripadvisor.co.uk/Attraction_Review-g325583-d1147641-Reviews-Noboribe	6	5	36	54	29	130	2	4	5	83	5.68182
Civet	Civet coffee farm	Farm	Indonesia	Luwak Civet Coffee Farm	2014-09-22	http://www.tripadvisor.co.uk/Attraction_Review-g303952-d2369501-Reviews-Luwak_Ci	14	3	16	34	22	89	2	1	14	56	20
Crocodile	Crocodile farm	Farm	Malaysia	Zoo	2014-12-03	http://www.tripadvisor.co.uk/Attraction_Review-g303998-d457054-Reviews-Crocodile	7	3	17	2	4	33	1	1	8	6	57.1429
Crocodile	Crocodile farm	Farm	Cambodia	Crocodile farm	2014-12-03	http://www.tripadvisor.co.uk/Attraction_Review-g297390-d2436544-Reviews-Siem_Rea	9	9	19	4	5	46	0	1	17	9	65.3846
Crocodile	Crocodile farm	Farm	South Africa	Farm	2014-12-03	http://www.tripadvisor.co.uk/Attraction_Review-g312636-d2471340-Reviews-Crocodil	2	6	22	31	21	82	0	4	4	52	7.14286
Crocodile	Crocodile farm	Farm	Thailand	Crocodile show	2014-12-03	http://www.tripadvisor.co.uk/Attraction_Review-g293918-d665043-Reviews-Samui_Cro	27	6	22	16	14	85	0	0	33	30	52.381
Crocodile	Crocodile farm	Farm	South Africa	Feeding	2014-12-03	http://www.tripadvisor.co.uk/Attraction_Review-g312652-d459787-Reviews-Kwena_Cro	3	2	13	30	37	85	2	2	1	67	1.47059
Crocodile	Crocodile farm	Farm	Malaysia	Crocodile feeding	2014-12-03	http://www.tripadvisor.co.uk/Attraction_Review-g298309-d1603968-Reviews-Jong_s_C	14	6	29	39	11	99	1	0	19	50	27.5362
Crocodile	Crocodile farm	Farm	Malaysia	Crocodile feeding	2014-12-03	http://www.tripadvisor.co.uk/Attraction_Review-g298283-d645103-Reviews-Langkawi_	44	22	21	24	8	119	3	5	58	32	64.4444
Crocodile	Crocodile farm	Farm	Gambia	Crocodile petting	2014-12-03	http://www.tripadvisor.co.uk/Attraction_Review-g479198-d2462024-Reviews-Katchika	2	7	25	69	50	153	2	2	5	119	4.03226
Crocodile	Crocodile farm	Farm	Australia	Egg laying, interaction	2014-12-03	http://www.tripadvisor.co.uk/Attraction_Review-g1808629-d1804289-Reviews-Koorana	6	2	7	25	15	55	6	1	1	40	2.43902
Crocodile	Crocodile farm	Farm	USA	Crocodile exhibit	2014-12-03	http://www.tripadvisor.co.uk/Attraction_Review-g34599-d2233177-Reviews-Crocodile	2	2	5	20	44	73	1	2	1	64	1.53846
Crocodile	Crocodile farm	Farm	Thailand	Crocodile show	2014-12-03	http://www.tripadvisor.co.uk/Attraction_Review-g293916-d455812-Reviews-Samutprak	46	14	42	41	31	174	0	1	59	72	45.0382
Crocodile	Crocodile farm	Farm	Philippines	Crocodile show	2014-12-03	http://www.tripadvisor.co.uk/Attraction_Review-g298459-d550275-Reviews-Crocodile	5	10	51	78	32	176	1	4	10	110	8.33333
Crocodile	Crocodile farm	Farm	France	Crocodile farm	2014-12-03	http://www.tripadvisor.co.uk/Attraction_Review-g196711-d2268795-Reviews-La_Ferme	4	9	39	135	89	276	3	9	1	224	0.444444
Crocodile	Crocodile farm	Farm	Australia	Crocodile feeding	2014-12-03	http://www.crocodileadventures.com/farm.html	1	3	37	225	659	925	1	1	2	884	0.225734
Dolphin	Dolphin swim (captive)	Captive	Mexico	Dolphin Discovery (Six Flags)	2014-10-28	http://www.tripadvisor.co.uk/Attraction_Review-g150800-d1732138-Reviews-Dolphin_	1	1	3	9	22	36	1	1	0	31	0
Dolphin	Dolphin swim (captive)	Captive	Honduras	Dolphin Encounter	2014-10-28	http://www.tripadvisor.co.uk/Attraction_Review-g292019-d3747498-Reviews-Dolphin_	0	0	4	4	32	40	0	0	0	36	0
Dolphin	Dolphin swim (captive)	Captive	USA	Cruise Orange Beach Dolphin Cruises	2014-10-28	http://www.tripadvisor.co.uk/Attraction_Review-g30753-d3546019-Reviews-Cruise_Or	0	0	1	0	49	50	0	0	0	49	0
Dolphin	Dolphin swim (captive)	Captive	Mexico	Dolphin Discovery (Mahahual)	2014-10-28	http://www.tripadvisor.co.uk/Attraction_Review-g499450-d2613067-Reviews-Dolphin_	2	0	3	12	35	52	1	0	1	47	2.08333
Dolphin	Dolphin swim (captive)	Captive	Mexico	Dolphin Discovery (Cozumel)	2014-10-28	http://www.tripadvisor.co.uk/Attraction_Review-g150809-d2639727-Reviews-Dolphin_	1	4	1	15	34	55	1	4	0	49	0
Dolphin	Dolphin swim (captive)	Captive	Indonesia	Melka Excelsior Dolphin & Wildlife Resort	2014-10-24	http://www.tripadvisor.co.uk/Attraction_Review-g1600236-d1371276-Reviews-Melka_E	26	4	10	14	22	76	1	1	28	36	43.75
Dolphin	Dolphin swim (captive)	Captive	Thailand	Pattaya Dolphin World	2014-10-22	http://www.tripadvisor.co.uk/Attraction_Review-g293919-d3461535-Reviews-Pattaya_	12	12	17	17	20	78	4	8	12	37	24.4898
Dolphin	Dolphin swim (captive)	Captive	Mexico	Dolphin Discovery (Akumal)	2014-10-28	http://www.tripadvisor.co.uk/Attraction_Review-g499445-d6784468-Reviews-Dolphin_	2	3	12	12	54	83	1	2	2	66	2.94118
Dolphin	Dolphin swim (captive)	Captive	Indonesia	Bali Dolphins - Bali Dolphin Interaction	2014-10-23	http://www.tripadvisor.co.uk/Attraction_Review-g297694-d3546032-Reviews-Bali_Dol	11	3	4	23	93	134	8	3	3	116	2.52101
Dolphin	Dolphin swim (captive)	Captive	Anguilla	Dolphin Discovery (Anguilla)	2014-10-23	http://www.tripadvisor.co.uk/Attraction_Review-g3547729-d3502282-Reviews-Dolphin	5	8	12	24	115	164	4	7	2	139	1.41844
Dolphin	Dolphin swim (captive)	Captive	Tortola	Dolphin Discovery (Tortola)	2014-10-23	http://www.tripadvisor.co.uk/Attraction_Review-g147355-d1726109-Reviews-Dolphin_	9	11	13	50	107	190	8	11	1	157	0.632911
Dolphin	Dolphin swim (captive)	Captive	Indonesia	Bali Dolphins	2014-10-08	http://www.tripadvisor.co.uk/Attraction_Review-g294226-d1556671-Reviews-Bali_Dol	29	4	15	39	117	204	17	1	15	156	8.77193
Dolphin	Dolphin swim (captive)	Captive	Jamaica	Dolphin Cove Negril	2014-10-23	http://www.tripadvisor.co.uk/Attraction_Review-g793509-d1936716-Reviews-Dolphin_	5	11	31	50	117	214	5	11	0	167	0
Dolphin	Dolphin swim (captive)	Captive	Mexico	Dolphin Discovery (Puerto Vallarta)	2014-10-23	http://www.tripadvisor.co.uk/Attraction_Review-g154267-d1726544-Reviews-Dolphin_	8	2	22	68	119	219	5	2	3	187	1.57895
Dolphin	Dolphin swim (captive)	Captive	Bahamas	Dolphion Encounters	2014-10-22	http://www.tripadvisor.co.uk/Attraction_Review-g147416-d149430-Reviews-Dolphin_E	3	7	7	40	191	248	2	6	2	231	0.858369
Dolphin	Dolphin swim (captive)	Captive	Mexico	Dolphin Discovery (Playa del Carmen)	2014-10-24	http://www.tripadvisor.co.uk/Attraction_Review-g150812-d4461810-Reviews-Dolphin_	10	12	13	53	165	253	7	12	3	218	1.35747
Dolphin	Dolphin swim (captive)	Captive	Grand Cayman	Dolphin Discovery (Grand Cayman)	2014-10-23	http://www.tripadvisor.co.uk/Attraction_Review-g1006573-d1415235-Reviews-Dolphin	16	11	33	73	142	275	9	10	8	215	3.58744
Dolphin	Dolphin swim (captive)	Captive	Mexico	Dolphin Discovery (Cozumel)	2014-10-07	http://www.tripadvisor.co.uk/Attraction_Review-g150809-d504590-Reviews-Dolphin_D	18	19	25	83	223	368	16	18	3	306	0.970874
Dolphin	Dolphin swim (captive)	Captive	Mexico	Dolphin Discovery (Los Cabos)	2014-10-23	http://www.tripadvisor.co.uk/Attraction_Review-g152516-d2146529-Reviews-Dolphin_	20	12	39	86	241	398	18	11	3	327	0.909091
Dolphin	Dolphin swim (captive)	Captive	Mexico	Dolphin Adventure by Vallarta Adventures	2014-10-24	http://www.tripadvisor.co.uk/Attraction_Review-g154267-d597921-Reviews-Dolphin_A	4	8	22	106	352	492	2	7	3	458	0.650759
Dolphin	Dolphin swim (captive)	Captive	Dominican Republic	Dolphin Island	2014-09-30	http://www.tripadvisor.co.uk/Attraction_Review-g147293-d590285-Reviews-Dolphin_I	40	53	98	200	295	686	30	49	14	495	2.75049
Dolphin	Dolphin swim (captive)	Captive	Mexico	Delphinus Swim With Dolphins	2014-10-08	http://www.tripadvisor.co.uk/Attraction_Review-g150807-d1918713-Reviews-Delphinu	21	27	69	168	405	690	16	23	9	573	1.54639
Dolphin	Dolphin swim (captive)	Captive	Mexico	Dolphin Discovery	2014-09-30	http://www.tripadvisor.co.uk/Attraction_Review-g150810-d275192-Reviews-Dolphin_D	35	37	69	181	409	731	28	32	12	590	1.99336
Dolphin	Dolphin swim (captive)	Captive	Mexico	Dolphin Discovery (cancun)	2014-09-30	http://www.tripadvisor.co.uk/Attraction_Review-g150807-d5432465-Reviews-Dolphin_	11	19	49	177	482	738	8	18	4	659	0.603318
Dolphin	Dolphin swim (captive)	Captive	Singapore	Underwater World and Dolphin Lagoon	2014-10-07	http://www.tripadvisor.co.uk/Attraction_Review-g294264-d324741-Reviews-Underwate	66	74	186	242	204	772	41	70	29	446	6.10526
Dolphin	Dolphin swim (captive)	Captive	Curacao	Curacao Dolphin Academy	2014-09-30	http://www.tripadvisor.co.uk/Attraction_Review-g147278-d274600-Reviews-Curacao_D	12	14	81	211	523	841	5	8	13	734	1.74029
Dolphin	Dolphin swim (captive)	Captive	Mexico	Dolphin Discovery (Isla Mujeres)	2014-10-08	http://www.tripadvisor.co.uk/Attraction_Review-g150810-d4211357-Reviews-Dolphin_	24	20	71	229	600	944	17	17	10	829	1.1919
Dolphin	Dolphin swim (captive)	Captive	Mexico	Dolphin Discovery (Yukatan)	2014-10-07	http://www.tripadvisor.co.uk/Attraction_Review-g153510-d295154-Reviews-Dolphin_D	45	48	101	250	517	961	35	45	13	767	1.66667
Dolphin	Dolphin swim (captive)	Captive	Mexico	Cabo Dolphins	2014-10-08	http://www.tripadvisor.co.uk/Attraction_Review-g152515-d659199-Reviews-Cabo_Dolp	25	30	51	195	671	972	23	27	5	866	0.574053
Dolphin	Dolphin swim (captive)	Captive	Dubai	Dolphin Bay	2014-09-29	http://www.tripadvisor.co.uk/Attraction_Review-g295424-d1176635-Reviews-Dolphin_	11	15	59	261	834	1180	7	10	9	1095	0.815217
Dolphin	Dolphin swim (captive)	Captive	Jamaica	Dolphin Cove	2014-09-29	http://www.tripadvisor.co.uk/Attraction_Review-g147312-d274030-Reviews-Dolphin_C	28	56	144	364	719	1311	23	54	7	1083	0.642202
Dolphin	Dolphin swim (captive)	Captive	Bahamas	Dolphin Close Encounter	2014-10-28	http://www.tripadvisor.co.uk/Attraction_Review-g147415-d148254-Reviews-Dolphin_C	0	0	3	5	43	51	0	0	0	48	0
Dolphin	Dolphin swim (captive)	Captive	Singapore	Dolphin Island	2014-10-22	http://www.tripadvisor.co.uk/Attraction_Review-g294265-d6609103-Reviews-Dolphin_	0	0	2	11	43	56	0	0	0	54	0
Dolphin	Dolphin swim (captive)	Captive	Palau	Dolphins Pacific	2014-10-28	http://www.tripadvisor.co.uk/Attraction_Review-g294136-d312535-Reviews-Dolphins_	8	2	6	20	23	59	3	1	6	43	12.2449
Dolphin	Dolphin swim (captive)	Captive	Bermuda	Dolphin quest (Bermuda)	2014-10-23	http://www.tripadvisor.co.uk/Attraction_Review-g562685-d149863-Reviews-Dolphin_Q	12	7	12	21	60	112	3	3	13	81	13.8298
Dolphin	Dolphin swim (captive)	Captive	USA	Dolphin Connection	2014-10-08	http://www.tripadvisor.co.uk/Attraction_Review-g34185-d1216135-Reviews-Dolphin_C	5	2	12	37	113	169	3	1	3	150	1.96078
Dolphin	Dolphin swim (captive)	Captive	USA	Dolphin Cove	2014-10-08	http://www.tripadvisor.co.uk/Attraction_Review-g34344-d552878-Reviews-Dolphin_Co	5	5	5	38	174	227	5	5	0	212	0
Dolphin	Dolphin swim (captive)	Captive	French Polynesia	Moorea Dolphin Center	2014-10-24	http://www.tripadvisor.co.uk/Attraction_Review-g309685-d1185280-Reviews-Moorea_D	23	4	27	62	114	230	8	1	18	176	9.27835
Dolphin	Dolphin swim (captive)	Captive	USA (Hawaii)	Dolphin Quest	2014-10-08	http://www.tripadvisor.co.uk/Attraction_Review-g60608-d126657-Reviews-Dolphin_Qu	9	9	32	86	202	338	5	7	6	288	2.04082
Dolphin	Dolphin swim (captive)	Captive	Australia	Pet Porpoise Pool - Dolphin Marine Magic	2014-10-22	http://www.tripadvisor.co.uk/Attraction_Review-g255059-d1458278-Reviews-Pet_Porp	9	4	28	87	280	408	9	4	0	367	0
Dolphin	Dolphin swim (captive)	Captive	USA	Dolphins Plus - Key Largo	2014-09-30	http://www.tripadvisor.co.uk/Attraction_Review-g34344-d107613-Reviews-Dolphins_P	4	8	6	61	451	530	4	8	0	512	0
Dolphin	Dolphin swim (captive)	Captive	Israel	Dolphin Reef	2014-10-08	http://www.tripadvisor.co.uk/Attraction_Review-g293980-d324121-Reviews-Dolphin_R	13	17	39	140	411	620	8	15	7	551	1.25448
Dolphin	Dolphin swim (captive)	Captive	Grand Cayman	Dolphin Cove	2014-10-23	http://www.tripadvisor.co.uk/Attraction_Review-g1006573-d1437338-Reviews-Dolphin	10	10	31	98	508	657	7	8	5	606	0.818331
Dolphin	Dolphin swim (captive)	Captive	Bahamas	Dolphin Cay Atlantis	2014-10-08	http://www.tripadvisor.co.uk/Attraction_Review-g147417-d1021336-Reviews-Dolphin_	37	46	96	205	432	816	35	44	4	637	0.624025
Dolphin	Dolphin swim (captive)	Captive	USA	Dolphin Research Center	2014-09-30	http://www.tripadvisor.co.uk/Attraction_Review-g499458-d552879-Reviews-Dolphin_R	11	12	39	138	725	925	6	12	5	863	0.576037
Dolphin	Dolphin swim (captive)	Captive	Dominican Republic	Dolphin Explorer	2014-09-30	http://www.tripadvisor.co.uk/Attraction_Review-g147293-d1640433-Reviews-Dolphin_	80	66	164	392	762	1464	67	64	15	1154	1.28315
Dolphin	Dolphin swim (wild)	Wild	USA (Hawaii)	Wild Dolphin Swims Hawaii - Day Tours	2014-10-28	http://www.tripadvisor.co.uk/Attraction_Review-g60872-d3546298-Reviews-Wild_Dolp	0	0	0	0	32	32	0	0	0	32	0
Dolphin	Dolphin swim (wild)	Wild	Costa Rica	The Divine Dolphin	2014-10-24	http://www.tripadvisor.co.uk/Attraction_Review-g313830-d2624616-Reviews-The_Divi	1	2	1	2	29	35	1	2	0	31	0
Dolphin	Dolphin swim (wild)	Wild	USA	Dolphin and Snorkel Tours	2014-10-28	http://www.tripadvisor.co.uk/Attraction_Review-g34543-d6473952-Reviews-Dolphin_a	0	0	0	0	36	36	0	0	0	36	0
Dolphin	Dolphin swim (wild)	Wild	Mexico	Dolphin Dive Center	2014-10-28	http://www.tripadvisor.co.uk/Attraction_Review-g150772-d627994-Reviews-Dolphin_D	1	1	0	2	37	41	1	1	0	39	0
Dolphin	Dolphin swim (wild)	Wild	New Zealand	Explore - Swim with Dolphins	2014-10-24	http://www.tripadvisor.co.uk/Attraction_Review-g255110-d1735596-Reviews-Explore_	1	3	3	14	24	45	1	3	0	38	0
Dolphin	Dolphin swim (wild)	Wild	Australia	Dolphin Swim Australia	2014-10-23	http://www.tripadvisor.co.uk/Attraction_Review-g529008-d1950693-Reviews-Dolphin_	1	0	0	0	57	58	0	0	1	57	1.72414
Dolphin	Dolphin swim (wild)	Wild	USA	Dolphin Paradise Tours	2014-10-28	http://www.tripadvisor.co.uk/Attraction_Review-g34436-d4995048-Reviews-Dolphin_P	17	5	9	11	21	63	16	0	6	32	15.7895
Dolphin	Dolphin swim (wild)	Wild	New Zealand	Carino Sailing & Dolphin Adventures	2014-10-28	http://www.tripadvisor.co.uk/Attraction_Review-g255110-d1180461-Reviews-Carino_S	0	3	2	6	54	65	0	3	0	60	0
Dolphin	Dolphin swim (wild)	Wild	New Zealand	Dolphin Seafaris	2014-10-23	http://www.tripadvisor.co.uk/Attraction_Review-g255114-d1990719-Reviews-Dolphin_	11	1	5	8	45	70	11	1	0	53	0
Dolphin	Dolphin swim (wild)	Wild	USA (Hawaii)	Dolphins and You	2014-10-22	http://www.tripadvisor.co.uk/Attraction_Review-g60982-d1939947-Reviews-Dolphins_	3	2	8	15	50	78	3	2	0	65	0
Dolphin	Dolphin swim (wild)	Wild	USA	Flippers Dolphin Tours	2014-10-28	http://www.tripadvisor.co.uk/Attraction_Review-g34543-d2354228-Reviews-Flippers_	0	0	0	2	80	82	0	0	0	82	0
Dolphin	Dolphin swim (wild)	Wild	USA	Barefoot Family Dolphin Safaris and Private Boating Adventures	2014-10-24	http://www.tripadvisor.co.uk/Attraction_Review-g30753-d3267874-Reviews-Barefoot_	0	0	0	4	125	129	0	0	0	129	0
Dolphin	Dolphin swim (wild)	Wild	USA (Hawaii)	Dolphin Journeys - Day Tours	2014-10-23	http://www.tripadvisor.co.uk/Attraction_Review-g60872-d2218893-Reviews-Dolphin_J	0	1	1	1	141	144	0	1	0	142	0
Dolphin	Dolphin swim (wild)	Wild	Australia	Dolphin Discovery Centre	2014-10-07	http://www.tripadvisor.co.uk/Attraction_Review-g255364-d2253697-Reviews-Dolphin_	6	7	21	48	89	171	6	7	0	137	0
Dolphin	Dolphin swim (wild)	Wild	Australia	Sea All Dolphin Swims	2014-10-23	http://www.tripadvisor.co.uk/Attraction_Review-g552246-d1587284-Reviews-Sea_All_	2	1	1	13	220	237	2	1	0	233	0
Dolphin	Dolphin swim (wild)	Wild	USA (Hawaii)	Dolphin Excursions Snorkel Adventure	2014-10-23	http://www.tripadvisor.co.uk/Attraction_Review-g60661-d1936703-Reviews-Dolphin_E	3	3	11	24	281	322	3	3	0	305	0
Dolphin	Dolphin swim (wild)	Wild	USA (Hawaii)	Dolphin Discoveries	2014-10-24	http://www.tripadvisor.co.uk/Attraction_Review-g60872-d560493-Reviews-Dolphin_Di	6	4	8	27	398	443	6	3	1	425	0.234742
Dolphin	Dolphin swim (wild)	Wild	Egypt	Dolphin House Reef (Sha'ab Samadai)	2014-10-22	http://www.tripadvisor.co.uk/Attraction_Review-g311425-d604075-Reviews-Dolphin_H	32	36	68	99	286	521	29	36	3	385	0.773196
Dolphin	Dolphin swim (wild)	Wild	French Polynesia	Dr. Poole's Private Dolphin and Whale Tour	2014-10-28	http://www.tripadvisor.co.uk/Attraction_Review-g309685-d1160332-Reviews-Dr_Poole	4	3	3	12	50	72	3	3	1	62	1.5873
Dolphin	Dolphin swim (wild)	Wild	Australia	Moonraker Dolphin Swims	2014-10-23	http://www.tripadvisor.co.uk/Attraction_Review-g552257-d1524155-Reviews-Moonrake	8	5	5	8	47	73	8	5	0	55	0
Dolphin	Dolphin swim (wild)	Wild	Australia	Polperro Dolphin Swimming	2014-10-28	http://www.tripadvisor.co.uk/Attraction_Review-g552257-d1627697-Reviews-Polperro	3	3	0	7	68	81	3	3	0	75	0
Dolphin	Dolphin swim (wild)	Wild	New Zealand	Swim with Dolphins Akaroa - Black Cat Cruises	2014-10-07	http://www.tripadvisor.co.uk/Attraction_Review-g285727-d1185791-Reviews-Swim_wit	5	4	5	16	114	144	5	4	0	130	0
Dolphin	Dolphin swim (wild)	Wild	New Zealand	Dolphin Encounter	2014-10-08	http://www.tripadvisor.co.uk/Attraction_Review-g255374-d533952-Reviews-Dolphin_E	2	2	6	24	357	391	2	2	0	381	0
Elephant	Elephant park	Captive	India	Elephant park Sancutary, Punnathur Kotta	2014-09-26	http://www.tripadvisor.co.uk/Attraction_Review-g1137974-d3187625-Reviews-Elephan	4	1	4	10	12	31	0	0	5	22	18.5185
Elephant	Elephant park	Captive	India	Kodanand Elephant Training Centre	2014-09-24	http://www.tripadvisor.co.uk/Attraction_Review-g2412277-d2445139-Reviews-Kodanan	21	4	9	4	5	43	0	1	24	9	72.7273
Elephant	Elephant park	Captive	Thailand	Eddy elephant	2014-09-26	http://www.tripadvisor.co.uk/Attraction_Review-g1951349-d4108052-Reviews-Eddy_El	5	1	2	12	32	52	1	0	5	44	10.2041
Elephant	Elephant park	Captive	India	Sakrebailu Elephant park	2014-09-24	http://www.tripadvisor.co.uk/Attraction_Review-g1156205-d3619275-Reviews-Sakreba	3	1	4	25	19	52	3	1	0	44	0
Elephant	Elephant park	Captive	Thailand	Taweechai Elephant park	2014-09-22	http://www.tripadvisor.co.uk/Attraction_Review-g297924-d3693057-Reviews-Taweecha	4	0	6	16	28	54	1	0	3	44	6.38298
Elephant	Elephant park	Captive	Thailand	Damnoen Saduak Elephant Village	2014-09-26	http://www.tripadvisor.co.uk/Attraction_Review-g303902-d2706770-Reviews-Damnoen_	14	5	18	6	14	57	5	3	11	20	35.4839
Elephant	Elephant park	Captive	Thailand	Wangpo Elephant park	2014-09-24	http://www.tripadvisor.co.uk/Attraction_Review-g297924-d1865796-Reviews-Wangpo_E	17	2	8	15	21	63	2	1	16	36	30.7692
Elephant	Elephant park	Captive	South Africa	Adventures with Elephants	2014-09-22	http://www.tripadvisor.co.uk/Attraction_Review-g659283-d2723114-Reviews-Adventur	0	0	0	5	67	72	0	0	0	72	0
Elephant	Elephant park	Captive	Thailand	Samphran Elephant Ground & Zoo	2014-09-26	http://www.tripadvisor.co.uk/Attraction_Review-g303914-d1385510-Reviews-Samphran	5	6	15	30	19	75	0	1	10	49	16.9492
Elephant	Elephant park	Captive	Thailand	Nosey Parker's Elephant park - Private Day Tours	2014-09-22	http://www.tripadvisor.co.uk/Attraction_Review-g297927-d2156151-Reviews-Nosey_Pa	28	8	14	33	34	117	5	1	30	67	30.9278
Elephant	Elephant park	Captive	Nepal	Elephant Breeding Centre	2014-09-26	http://www.tripadvisor.co.uk/Attraction_Review-g1367591-d3653730-Reviews-Elephan	12	13	31	35	41	132	0	5	20	76	20.8333
Elephant	Elephant park	Captive	Thailand	Thom's Pai Elephant park	2014-09-22	http://www.tripadvisor.co.uk/Attraction_Review-g303916-d1391314-Reviews-Thom_s_P	14	5	14	34	68	135	4	3	12	102	10.5263
Elephant	Elephant park	Captive	Thailand	Elephant Village (Hua Hin)	2014-09-22	http://www.tripadvisor.co.uk/Attraction_Review-g297922-d1569918-Reviews-Elephant	24	12	39	44	25	144	2	5	29	69	29.5918
Elephant	Elephant park	Captive	South Africa	Elephant Sanctuary (one of three)	2014-09-22	http://www.tripadvisor.co.uk/Attraction_Review-g1382495-d982992-Reviews-Elephant	8	6	19	59	106	198	7	4	3	165	1.78571
Elephant	Elephant park	Captive	South Africa	Elephant Whispers	2014-09-22	http://www.tripadvisor.co.uk/Attraction_Review-g312630-d1178288-Reviews-Elephant	3	1	9	35	173	221	3	0	1	208	0.478469
Elephant	Elephant park	Captive	Indonesia	Elephant Safari Park, Taro Ubud	2014-09-26	http://www.tripadvisor.co.uk/Attraction_Review-g294226-d2320650-Reviews-Elephant	39	24	44	168	329	604	7	3	53	497	9.63636
Elephant	Elephant park	Captive	Thailand	Maesa Elephant park	2014-09-22	http://www.tripadvisor.co.uk/Attraction_Review-g1766192-d1051038-Reviews-Maesa_E	44	29	75	255	401	804	4	9	60	656	8.37989
Elephant	Elephant park	Captive	Indonesia	Bali Elephant Tour	2014-09-26	http://www.tripadvisor.co.uk/Attraction_Review-g297694-d1898399-Reviews-Bali_Ele	32	8	9	7	4	60	0	2	38	11	77.551
Elephant	Elephant park	Captive	India	Dera Amer Elephant Safari	2014-09-22	http://www.tripadvisor.co.uk/Attraction_Review-g304555-d659756-Reviews-Dera_Amer	0	2	2	8	48	60	0	2	0	56	0
Elephant	Elephant park	Captive	South Africa	Addo Elephant Back Safaris	2014-09-22	http://www.tripadvisor.co.uk/Attraction_Review-g469382-d1638773-Reviews-Addo_Ele	2	1	4	16	41	64	2	1	0	57	0
Elephant	Elephant park	Captive	Thailand	Extraordinary Elephant Day Trip	2014-09-22	http://www.tripadvisor.co.uk/Attraction_Review-g293916-d2220607-Reviews-Extraord	0	0	0	7	62	69	0	0	0	69	0
Elephant	Elephant park	Captive	Zambia	Safari Par Excellence - Elephant Back Safari	2014-09-26	http://www.tripadvisor.co.uk/Attraction_Review-g298090-d1632429-Reviews-Safari_P	3	1	8	19	42	73	2	1	1	61	1.6129
Elephant	Elephant park	Captive	South Africa	Shearwater Elephant Back Safaris	2014-09-26	http://www.tripadvisor.co.uk/Attraction_Review-g293761-d3973902-Reviews-Shearwat	0	1	3	15	66	85	0	1	0	81	0
Elephant	Elephant park	Captive	Thailand	Blue Elephant Thailand Tours	2014-09-22	http://www.tripadvisor.co.uk/Attraction_Review-g293917-d2205168-Reviews-Blue_Ele	5	2	6	30	351	394	4	2	1	381	0.26178
Elephant	Elephant park	Captive	Thailand	Kok Chang Safari Elephant Trekking	2014-09-22	http://www.tripadvisor.co.uk/Attraction_Review-g1210687-d1733674-Reviews-Kok_Cha	34	21	41	165	331	592	2	7	46	496	8.48708
Elephant	Elephant park	Captive	India	Elephant Joy	2014-09-26	http://www.tripadvisor.co.uk/Attraction_Review-g304555-d5995183-Reviews-Elephant	0	0	0	2	28	30	0	0	0	30	0
Elephant	Elephant park	Captive	Thailand	Saiyok Elephant Park	2014-09-26	http://www.tripadvisor.co.uk/Attraction_Review-g2237738-d2723871-Reviews-Saiyok_	4	2	3	9	13	31	1	0	5	22	18.5185
Elephant	Elephant park	Captive	Thailand	Baanchang Elephant's Paradise	2014-09-22	http://www.tripadvisor.co.uk/Attraction_Review-g1951349-d4467852-Reviews-Baancha	0	0	1	2	38	41	0	0	0	40	0
Elephant	Elephant park	Captive	South Africa	Elephant Sanctuary (one of three)	2014-09-26	http://www.tripadvisor.co.uk/Attraction_Review-g780944-d2577821-Reviews-Elephant	2	6	6	16	28	58	0	1	7	44	13.7255
Elephant	Elephant park	Captive	Thailand	The Elephant Training Center Chiang Dao	2014-09-22	http://www.tripadvisor.co.uk/Attraction_Review-g1951349-d642983-Reviews-The_Elep	1	1	7	26	33	68	0	0	2	59	3.27869
Elephant	Elephant park	Captive	Thailand	Jumbo Elephant park Day Tour	2014-09-24	http://www.tripadvisor.co.uk/Attraction_Review-g293917-d1955060-Reviews-Jumbo_El	23	12	10	8	24	77	7	8	20	32	38.4615
Elephant	Elephant park	Captive	Thailand	Elephant Nature Foundation - Surin Project	2014-09-24	http://www.tripadvisor.co.uk/Attraction_Review-g303923-d1791168-Reviews-Elephant	0	0	1	7	70	78	0	0	0	77	0
Elephant	Elephant park	Captive	Indonesia	Bali Elephant park	2014-09-22	http://www.tripadvisor.co.uk/Attraction_Review-g297701-d1149238-Reviews-Bali_Ele	8	2	12	27	59	108	1	1	8	86	8.51064
Elephant	Elephant park	Captive	Thailand	Ban Chang Thai - Elephant park	2014-09-22	http://www.tripadvisor.co.uk/Attraction_Review-g580110-d2414801-Reviews-Ban_Chan	15	6	12	35	54	122	3	2	16	89	15.2381
Elephant	Elephant park	Captive	South Africa	Elephant Sanctuary (one of three)	2014-09-26	http://www.tripadvisor.co.uk/Attraction_Review-g312630-d1211496-Reviews-Elephant	5	8	6	39	76	134	0	5	8	115	6.50407
Elephant	Elephant park	Captive	Thailand	Maetang Elephant Park	2014-09-22	http://www.tripadvisor.co.uk/Attraction_Review-g293917-d1822076-Reviews-Maetang_	32	15	26	58	54	185	0	4	43	112	27.7419
Elephant	Elephant park	Captive	Sri Lanka	The Millennium Elephant Foundation	2014-09-22	http://www.tripadvisor.co.uk/Attraction_Review-g1987470-d677575-Reviews-The_Mill	44	20	31	35	57	187	5	12	47	92	33.8129
Elephant	Elephant park	Captive	Thailand	Baanchang Elephant Park - Magical training	2014-09-24	http://www.tripadvisor.co.uk/Attraction_Review-g293917-d1229775-Reviews-Magical_	3	1	5	25	156	190	2	1	1	181	0.549451
Elephant	Elephant park	Captive	Thailand	Thai Elephant Conservation Center	2014-09-22	http://www.tripadvisor.co.uk/Attraction_Review-g303911-d450820-Reviews-Thai_Elep	6	4	15	44	158	227	4	2	4	202	1.94175
Elephant	Elephant park	Captive	Thailand	Woody Elephant Training	2014-09-22	http://www.tripadvisor.co.uk/Attraction_Review-g1951349-d2039530-Reviews-Woody_E	8	6	8	23	193	238	2	1	11	216	4.84581
Elephant	Elephant park	Captive	India	Dubare Elephant park	2014-09-22	http://www.tripadvisor.co.uk/Attraction_Review-g503697-d498674-Reviews-Dubare_El	11	15	61	109	70	266	7	10	9	179	4.78723
Elephant	Elephant park	Captive	Malaysia	Kuala Gandah Elephant Sanctuary	2014-09-22	http://www.tripadvisor.co.uk/Attraction_Review-g298291-d504486-Reviews-Kuala_Gan	15	19	36	89	138	297	4	8	22	227	8.83534
Elephant	Elephant park	Captive	Thailand	Hutsadin Elephant Foundation	2014-09-22	http://www.tripadvisor.co.uk/Attraction_Review-g297922-d2038063-Reviews-Hutsadin	16	12	21	84	189	322	4	8	16	273	5.53633
Elephant	Elephant park	Captive	Laos	Elephant Village Sanctuary Day Trips	2014-09-22	http://www.tripadvisor.co.uk/Attraction_Review-g295415-d1868287-Reviews-Elephant	22	23	32	92	280	449	17	13	15	372	3.87597
Elephant	Elephant park	Captive	Thailand	Elephant Village Pattaya	2014-09-22	http://www.tripadvisor.co.uk/Attraction_Review-g293919-d464600-Reviews-Elephant_	12	19	54	138	235	458	5	13	13	373	3.36788
Elephant	Elephant park	Captive	Thailand	Ran-Tong Elephant Training - Day Tours	2014-09-22	http://www.tripadvisor.co.uk/Attraction_Review-g293917-d2099610-Reviews-Ran_Tong	10	10	13	67	418	518	4	5	11	485	2.21774
Elephant	Elephant park	Captive	Thailand	Thai Elephant Home	2014-09-22	http://www.tripadvisor.co.uk/Attraction_Review-g1951349-d1422414-Reviews-Thai_El	8	5	10	55	450	528	3	1	9	505	1.75097
Elephant	Elephant park	Captive	South Africa	Knysna Elephant Park	2014-09-23	http://www.tripadvisor.co.uk/Attraction_Review-g312664-d459761-Reviews-Knysna_El	6	11	50	160	494	721	3	7	7	654	1.059
Elephant	Elephant park	Captive	Sri Lanka	Pinnawala Elephant Orphanage	2014-09-26	http://www.tripadvisor.co.uk/Attraction_Review-g304139-d647515-Reviews-Pinnawala	162	81	149	296	239	927	8	18	217	535	28.8564
Elephant	Elephant park	Captive	Thailand	Baanchang Elephant Park - Private Day Tours	2014-09-23	http://www.tripadvisor.co.uk/Attraction_Review-g293917-d1907703-Reviews-Baanchan	11	8	26	112	851	1008	4	3	12	963	1.23077
Elephant	Elephant park	Captive	Thailand	Patara Elephant Farm - Private Tours	2014-09-23	http://www.tripadvisor.co.uk/Attraction_Review-g293917-d808754-Reviews-Patara_El	6	5	21	102	1813	1947	3	5	3	1915	0.156413
Elephant	Elephant park	Captive	Thailand	Elephant Special Tours	2014-09-22	http://www.tripadvisor.co.uk/Attraction_Review-g1308496-d1960814-Reviews-Elephan	0	0	0	0	81	81	0	0	0	81	0
Elephant	Elephant park	Captive	Thailand	Elephant Discovery Chiang Mai - Day Tours	2014-09-22	http://www.tripadvisor.co.uk/Attraction_Review-g293917-d5561734-Reviews-Elephant	0	0	0	5	124	129	0	0	0	129	0
Elephant	Elephant park	Captive	Thailand	Seaview Elephant park	2014-09-22	http://www.tripadvisor.co.uk/Attraction_Review-g297931-d2219390-Reviews-Seaview_	29	6	10	15	10	70	6	2	27	25	51.9231
Elephant	Elephant park	Captive	Thailand	Maetaman Elephant park	2014-09-22	http://www.tripadvisor.co.uk/Attraction_Review-g1766192-d1574228-Reviews-Maetama	29	11	16	45	44	145	2	3	35	89	28.2258
Gorilla	Gorilla trekking	Wild	Uganda	Gorillas and Wildlife Safaris - Day Tours	2014-10-09	http://www.tripadvisor.co.uk/Attraction_Review-g319722-d5016665-Reviews-Gorillas	0	1	3	6	24	34	0	1	0	30	0
Gorilla	Gorilla trekking	Wild	Uganda	Nkuringo Gorilla Camp Walk	2014-10-09	http://www.tripadvisor.co.uk/Attraction_Review-g319722-d2398260-Reviews-Nkuringo	0	0	1	4	28	33	0	0	0	32	0
Lion	Lion interaction	Captive	South Africa	Lion Park	2014-10-15	http://www.tripadvisor.co.uk/Attraction_Review-g4063419-d481147-Reviews-Lion_Par	30	29	122	332	385	898	9	10	40	717	5.28402
Lion	Lion interaction	Captive	USA	Lion Habitat Ranch	2014-10-15	http://www.tripadvisor.co.uk/Attraction_Review-g45953-d3819966-Reviews-Lion_Habi	2	0	2	10	39	53	0	0	2	49	3.92157
Lion	Lion interaction	Captive	Mauritius	Safari Adventures Lion Encounter	2014-10-15	http://www.tripadvisor.co.uk/Attraction_Review-g656263-d1047774-Reviews-Safari_A	2	1	4	8	43	58	1	0	2	51	3.77358
Lion	Lion interaction	Captive	Zimbabwe	Lion Encounter - Walking with Lions Victoria Falls (South province)	2014-10-16	http://www.tripadvisor.co.uk/Attraction_Review-g298090-d1548946-Reviews-Lion_Enc	1	2	7	13	50	73	0	0	3	63	4.54545
Lion	Lion interaction	Captive	South Africa	Seaview Lion Park	2014-10-15	http://www.tripadvisor.co.uk/Attraction_Review-g312559-d2257762-Reviews-Seaview_	15	13	16	35	30	109	3	4	21	65	24.4186
Lion	Lion interaction	Captive	South Africa	Ukutula Lion Park	2014-10-15	http://www.tripadvisor.co.uk/Attraction_Review-g2205639-d2197370-Reviews-Ukutula	10	0	2	9	111	132	2	0	8	120	6.25
Lion	Lion interaction	Captive	Zambia	Lion Encounter - Walking with Lions Zambia	2014-10-16	http://www.tripadvisor.co.uk/Attraction_Review-g298089-d1837465-Reviews-Lion_Enc	4	1	8	22	108	143	2	0	3	130	2.25564
Lion	Lion interaction	Captive	South Africa	Lion and Rhino Nature Reserve	2014-10-15	http://www.tripadvisor.co.uk/Attraction_Review-g312581-d2277525-Reviews-Lion_and	5	5	10	72	93	185	1	3	6	165	3.50877
Lion	Lion interaction	Captive	Zimbabwe	Lion Encounter - Walking with Lions Victoria Falls (North province)	2014-10-15	http://www.tripadvisor.co.uk/Attraction_Review-g293761-d1152917-Reviews-Walking_	15	6	15	30	152	218	1	2	18	182	9
Shark	Shark cage diving	Wild	South Africa	Shark cage diving	2014-12-04	http://www.tripadvisor.co.uk/Attraction_Review-g472522-d2296047-Reviews-Supreme_	3	1	3	14	21	42	3	1	0	35	0
Shark	Shark cage diving	Wild	South Africa	Shark cage diving	2014-12-04	http://www.tripadvisor.co.uk/Attraction_Review-g312653-d2645915-Reviews-Shark_Ex	1	0	1	3	37	42	1	0	0	40	0
Shark	Shark cage diving	Wild	South Africa	Shark cage diving	2014-12-04	http://www.tripadvisor.co.uk/Attraction_Review-g472522-d1102254-Reviews-White_Sh	4	0	6	18	60	88	4	0	0	78	0
Shark	Shark cage diving	Wild	South Africa	Shark cage diving	2014-12-04	http://www.tripadvisor.co.uk/Attraction_Review-g472522-d2165726-Reviews-White_Sh	6	4	6	15	61	92	5	4	1	76	1.2987
Shark	Shark cage diving	Wild	USA	Shark cage diving	2014-12-04	http://www.tripadvisor.co.uk/Attraction_Review-g60647-d650480-Reviews-North_Shor	14	11	11	57	273	366	14	11	0	330	0
Shark	Shark cage diving	Wild	Australia	Shark cage diving	2014-12-04	http://www.tripadvisor.co.uk/Attraction_Review-g499726-d1487321-Reviews-Calypso_	7	7	4	31	449	498	7	7	0	480	0
Shark	Shark cage diving	Wild	South Africa	Shark cage diving	2014-12-04	http://www.tripadvisor.co.uk/Attraction_Review-g1722390-d2150161-Reviews-Great_W	2	1	2	6	31	42	2	1	0	37	0
Shark	Shark cage diving	Wild	South Africa	Shark cage diving	2014-12-04	http://www.tripadvisor.co.uk/Attraction_Review-g317080-d3693480-Reviews-White_Sh	0	2	2	17	46	67	0	1	1	63	1.5625
Shark	Shark cage diving	Wild	South Africa	Shark cage diving	2014-12-04	http://www.tripadvisor.co.uk/Attraction_Review-g472522-d668201-Reviews-White_Sha	9	7	5	24	73	118	9	7	0	97	0
Shark	Shark cage diving	Wild	South Africa	Shark cage diving	2014-12-04	http://www.tripadvisor.co.uk/Attraction_Review-g319718-d1887135-Reviews-African_	2	1	0	17	132	152	2	1	0	149	0
Shark	Shark cage diving	Wild	Australia	Shark cage diving	2014-12-04	http://www.tripadvisor.co.uk/Attraction_Review-g499726-d2256095-Reviews-Rodney_F	0	0	1	3	150	154	0	0	0	153	0
Shark	Shark cage diving	Wild	South Africa	Shark cage diving	2014-12-04	http://www.tripadvisor.co.uk/Attraction_Review-g472522-d1723874-Reviews-Shark_Di	6	13	19	23	105	166	6	13	0	128	0
Shark	Shark cage diving	Wild	South Africa	Shark cage diving	2014-12-04	http://www.tripadvisor.co.uk/Attraction_Review-g319718-d2074064-Reviews-Apex_Sha	1	1	4	10	161	177	1	1	0	171	0
Shark	Shark cage diving	Wild	USA	Shark cage diving	2014-12-04	http://www.tripadvisor.co.uk/Attraction_Review-g60647-d291424-Reviews-Hawaii_Sha	7	8	9	40	140	204	7	8	0	180	0
Shark	Shark cage diving	Wild	South Africa	Shark cage diving	2014-12-04	http://www.tripadvisor.co.uk/Attraction_Review-g472522-d1463262-Reviews-White_Sh	4	5	15	46	187	257	4	5	0	233	0
Tiger	Tiger temple	Captive	Thailand	Tiger Kingdom, Kathu, Thailand	2014-09-19	http://www.tripadvisor.co.uk/Attraction_Review-g297931-d4558112-Reviews-Tiger_Ki	22	33	58	208	499	820	4	11	40	707	5.35475
Tiger	Tiger temple	Captive	Thailand	Tiger Kingdom, Mae Rim, Thailand	2014-09-19	http://www.tripadvisor.co.uk/Attraction_Review-g1766192-d1151436-Reviews-Tiger_K	209	88	191	628	911	2027	13	16	268	1539	14.8312
Tiger	Tiger temple	Captive	Thailand	TIGER TEMPLE KANCHANABURI COMBINED			351	113	187	314	645	1610	37	36	391	959	28.963
Turtle	Turtle farm	Captive	Sri Lanka	Sea Turtle Farm & Hatchery	2014-10-21	http://www.tripadvisor.co.uk/Attraction_Review-g293961-d1630423-Reviews-Sea_Turt	5	2	10	13	7	37	1	0	6	20	23.0769
Turtle	Turtle farm	Captive	Indonesia	Bali Turtle Conservatory	2014-10-22	http://www.tripadvisor.co.uk/Attraction_Review-g1465999-d4832260-Reviews-Bali_Tu	11	5	7	8	11	42	1	0	15	19	44.1176
Turtle	Turtle farm	Captive	Mexico	Tortugranja (Turtle Farm)	2014-10-21	http://www.tripadvisor.co.uk/Attraction_Review-g150810-d297797-Reviews-Tortugran	17	28	171	348	394	958	0	13	32	742	4.13437
Turtle	Turtle farm	Captive	Grand Cayman	Cayman Turtle Farm: Island Wildlife Encounter	2014-10-21	http://www.tripadvisor.co.uk/Attraction_Review-g1006573-d2173510-Reviews-Cayman_	54	70	195	375	411	1105	13	37	74	786	8.60465
Bear	Bear sanctuary	Sanctuary	Romania	Libearty Bear Sanctuary Zarnesti	2014-10-09	http://www.tripadvisor.co.uk/Attraction_Review-g295394-d2249898-Reviews-Libearty	1	0	3	13	49	66	1	0	0	62	0
Bear	Bear sanctuary	Sanctuary	Malaysia	Bornean Sun Bear Conservation Centre	2014-10-09	http://www.tripadvisor.co.uk/Attraction_Review-g303997-d6278067-Reviews-Bornean_	0	4	13	34	54	105	0	4	0	88	0
Elephant	Elephant sanctuary	Sanctuary	Sri Lanka	Elephant Freedom Project	2014-09-22	http://www.tripadvisor.co.uk/Attraction_Review-g1987470-d5931827-Reviews-Elephan	0	0	0	3	35	38	0	0	0	38	0
Elephant	Elephant sanctuary	Sanctuary	Thailand	Elephant Retirement Park	2014-09-24	http://www.tripadvisor.co.uk/Attraction_Review-g1951349-d6547149-Reviews-Elephan	2	0	1	3	55	61	2	0	0	58	0
Elephant	Elephant sanctuary	Sanctuary	Cambodia	Elephant Valley Project	2014-09-22	http://www.tripadvisor.co.uk/Attraction_Review-g1893367-d3965757-Reviews-Elephan	0	0	2	11	58	71	0	0	0	69	0
Elephant	Elephant sanctuary	Sanctuary	Laos	Elephant Conservation Centre	2014-09-22	http://www.tripadvisor.co.uk/Attraction_Review-g2642380-d2624675-Reviews-Elephan	0	2	3	7	78	90	0	1	1	85	1.16279
Elephant	Elephant sanctuary	Sanctuary	Thailand	Boon Lott's Elephant Sanctuary	2014-09-24	http://www.tripadvisor.co.uk/Attraction_Review-g303921-d1414961-Reviews-Boon_Lot	2	2	1	1	87	93	2	2	0	88	0
Elephant	Elephant sanctuary	Sanctuary	Thailand	Elephant's World - Day Tour	2014-09-22	http://www.tripadvisor.co.uk/Attraction_Review-g297924-d1892148-Reviews-Elephant	2	3	4	24	326	359	0	2	3	350	0.849858
Elephant	Elephant sanctuary	Sanctuary	Thailand	Elephant Nature Park - Day Tours	2014-09-23	http://www.tripadvisor.co.uk/Attraction_Review-g293917-d601884-Reviews-Elephant_	17	19	54	230	2565	2885	15	15	6	2795	0.214209
Lion	Lion sanctuary	Sanctuary	South Africa	Drakenstein Lion Park	2014-10-15	http://www.tripadvisor.co.uk/Attraction_Review-g312653-d567413-Reviews-Drakenste	1	2	3	14	33	53	1	2	0	47	0
Orangutan	Orang-utan sanctuary	Sanctuary	Malaysia	Education	2014-12-05	http://www.tripadvisor.co.uk/Attraction_Review-g298307-d4602918-Reviews-Shangri_	1	9	41	104	175	330	1	9	0	279	0
Orangutan	Orang-utan sanctuary	Sanctuary	Malaysia	Education	2014-12-05	http://www.tripadvisor.co.uk/Attraction_Review-g298307-d1887063-Reviews-Sepilok_	7	39	123	264	331	764	7	39	0	595	0
Orangutan	Orang-utan sanctuary	Sanctuary	Malaysia	Zoo	2014-12-05	http://www.tripadvisor.co.uk/Attraction_Review-g298309-d2524446-Reviews-Matang_W	9	13	24	27	24	97	1	5	16	51	23.8806
Orangutan	Orang-utan sanctuary	Sanctuary	Indonesia	Orangutan sightseeing	2014-12-05	http://www.orangutans-sos.org/visit_sumatra/bukit_lawang	0	0	9	11	28	48	0	0	0	39	0
